# Supplementary material
Source: ML conference proceedings conference paper supplement (https://proceedings.neurips.cc/paper_files/paper/2018/hash/09779bb7930c8a0a44360e12b538ae3c-Abstract.html)
Supplement: Supplementary file [file 09779bb7930c8a0a44360e12b538ae3c-Supplemental.zip]

## 7 Appendix

### 7.1 Proof for Theorem 1

Let  $g(M)$  be a smooth function such that  $\nabla g(M)$  is Lipschitz-continuous with parameter  $\rho$ , that is,

$$g(M') - g(M) - \langle \nabla g(M), M' - M \rangle \leq \frac{\rho}{2} \|M' - M\|_F^2.$$

Then  $\nabla_j f(c) = z_j^T \nabla g(M) z_j$  is Lipschitz-continuous with parameter  $\gamma$ , a number of order  $O(1)$  when  $g(\cdot)$  is an empirical risk normalized by  $N$ . Let  $\mathcal{A}$  be the active set before adding a component  $\hat{j}$ . Consider the descent amount produced by minimizing  $F(c)$  w.r.t. the  $c_{\hat{j}}$  given that  $0 \in \partial_j F(c)$  for all  $j \in \mathcal{A}$  due to the subproblem in the previous iteration. Let  $j = \hat{j}$ , for any  $\eta_j$  we have

$$\begin{aligned} F(c + \eta_j e_j) - F(c) &\leq \nabla_j f(c) \eta_j + \lambda |\eta_j| + \frac{\gamma}{2} \eta_j^2 \\ &\leq \mu \nabla_{j^*} f(c) \eta_j + \lambda |\eta_j| + \frac{\gamma}{2} \eta_j^2 \\ &\leq \mu \nabla_{j^*} f(c) \eta_j + \lambda |\eta_j| + \frac{\gamma}{2} \eta_j^2 \end{aligned}$$

Minimize w.r.t  $\eta_j$  gives

$$\begin{aligned} &\min_{\eta_j} F(c + \eta_j e_j) - F(c) \\ &\leq \min_{\eta_j} \mu \nabla_{j^*} f(c) \eta_j + \lambda |\eta_j| + \frac{\gamma}{2} \eta_j^2 \\ &\leq \min_{\eta_j} \mu \nabla_{j^*} f(c) \eta_j + \lambda |\eta_j| + \frac{\gamma}{2} \eta_j^2 \\ &= \min_{\eta_k: k \notin \mathcal{A}} \sum_{k \notin \mathcal{A}} \left( \mu \nabla_k f(c) \eta_k + \lambda |\eta_k| \right) + \frac{\gamma}{2} \left( \sum_{k \notin \mathcal{A}} |\eta_k| \right)^2 \\ &\leq \min_{\eta_k: k \notin \mathcal{A}} \mu \sum_{k \notin \mathcal{A}} \left( \nabla_k f(c) \eta_k + \lambda |\eta_k| \right) + \frac{\gamma}{2} \left( \sum_{k \notin \mathcal{A}} |\eta_k| \right)^2 \\ &\quad + (1 - \mu) \lambda \sum_{k \notin \mathcal{A}} |\eta_k| \end{aligned}$$

where the last equality is justified by Lemma 2 provided later. For  $k \in \mathcal{A}$ , we have

$$0 = \min_{\eta_k: k \in \mathcal{A}} \mu \sum_{k \in \mathcal{A}} (\nabla_k f(c) \eta_k + \lambda |c_k + \eta_k| - \lambda |c_k|)$$

Combining cases for  $k \notin \mathcal{A}$  and  $k \in \mathcal{A}$ , we can obtain a global estimate of descent amount compared to some optimal solution  $x^*$  as follows

$$\begin{aligned} &\min_{\eta_j} F(c + \eta_j e_{\hat{j}}) - F(c) \\ &\leq \min_{\eta} \mu \left( \langle \nabla f(c), \eta \rangle + \lambda \|c + \eta\|_1 - \lambda \|c\|_1 \right) \\ &\quad + \frac{\gamma}{2} \left( \sum_{k \notin \mathcal{A}} |\eta_k| \right)^2 + (1 - \mu) \lambda \sum_{k \notin \mathcal{A}} |\eta_k| \\ &\leq \min_{\eta} \mu \left( F(c + \eta) - F(c) \right) + \frac{\gamma}{2} \left( \sum_{k \notin \mathcal{A}} |\eta_k| \right)^2 + (1 - \mu) \lambda \sum_{k \notin \mathcal{A}} |\eta_k| \\ &\leq \min_{\alpha \in [0, 1]} \mu \left( F(c + \alpha(c^* - c)) - F(c) \right) + \frac{\alpha \gamma}{2} \|c^*\|_1^2 + \alpha(1 - \mu) \lambda \|c^*\|_1 \\ &\leq \min_{\alpha \in [0, 1]} -\alpha \mu \left( F(c) - F(c^*) \right) + \frac{\alpha^2 \gamma}{2} \|c^*\|_1^2 + \alpha(1 - \mu) \lambda \|c^*\|_1. \end{aligned}$$

It means we can always choose an  $\alpha$  small enough to guarantee descent if

$$F(c) - F(c^*) > \frac{(1-\mu)}{\mu} \lambda \|c^*\|_1. \quad (20)$$

Then for

$$F(c) - F(c^*) \geq \frac{2(1-\mu)}{\mu} \lambda \|c^*\|_1, \quad (21)$$

we have

$$\begin{aligned} & \min_{\eta_j} F(c + \eta_j e_j) - F(c) \\ & \leq \min_{\alpha \in [0,1]} -\frac{\alpha\mu}{2} \left( F(c) - F(c^*) \right) + \frac{\alpha^2\gamma}{2} \|c^*\|_1^2. \end{aligned}$$

Minimizing w.r.t. to  $\alpha$  gives the convergence guarantee

$$F(c^t) - F(c^*) \leq \frac{2\gamma \|c^*\|_1^2}{\mu^2} \frac{1}{t}.$$

for any iterate with  $F(c^t) - F(c^*) \geq \frac{2(1-\mu)}{\mu} \lambda \|c^*\|_1$ .

**Lemma 2.**

$$\min_{\eta_j} \mu \nabla_{j^*} f(c) \eta_j + \lambda |\eta_j| + \frac{\gamma}{2} \eta_j^2 \quad (22)$$

$$= \min_{\eta_k: k \notin \mathcal{A}} \sum_{k \notin \mathcal{A}} \left( \mu \nabla_k f(c) \eta_k + \lambda |\eta_k| \right) + \frac{\gamma}{2} \left( \sum_{k \notin \mathcal{A}} |\eta_k| \right)^2 \quad (23)$$

*Proof.* The minimization (28) is equivalent to

$$\begin{aligned} & \min_{\eta_k: k \notin \mathcal{A}} \sum_{k \notin \mathcal{A}} \left( \mu \nabla_k f(c) \eta_k \right) \\ & s.t. \quad \left( \sum_{k \notin \mathcal{A}} |\eta_k| \right)^2 \leq C_1, \quad \sum_{k \notin \mathcal{A}} |\eta_k| \leq C_2. \end{aligned}$$

and therefore is equivalent to

$$\begin{aligned} & \min_{\eta_k: k \notin \mathcal{A}} \mu \sum_{k \notin \mathcal{A}} \nabla_k f(c) \eta_k \\ & s.t. \quad \sum_{k \notin \mathcal{A}} |\eta_k| \leq \min\{\sqrt{C_1}, C_2\} \end{aligned}$$

which is a linear objective subject to a convex set and thus always has solution that lies on the corner point with only one non-zero coordinate  $\eta_{j^*}$ , which then gives the same minimum as (27).  $\square$

## 7.2 Proof for Lemma 1

Since  $\text{supp}(c^*) = \mathcal{A}^*$ , and  $c^*$  is optimal when restricted on the support, we have  $\langle \eta, c^* \rangle = 0$  for some  $\eta \in \partial F(c^*)$ . And since  $F(c)$  is strongly convex on the support  $\mathcal{A}^*$  with parameter  $\beta$ , we have

$$\begin{aligned} F(0) - F(c^*) &= F(0) - F(c^*) - \langle \eta, 0 - c^* \rangle \\ &\geq \frac{\beta}{2} \|c^* - 0\|_2^2, \end{aligned}$$

which gives us

$$\|c^*\|_2^2 \leq \frac{2(F(0) - F(c^*))}{\beta}.$$

Combining above with the fact for any  $c$ ,  $\|c\|_1^2 \leq \|c\|_0 \|c\|_2^2$ , we obtain the result.

### 7.3 Proof for Theorem 2

**Lemma 3.** Let  $r(W)$  and  $r_N(W)$  be the risk (2) and the empirical risk respectively, we have

$$\begin{aligned} & \sup_{W \in \mathbb{R}^{K \times D}: \|W\|_F \leq R} |r(W) - r_N(W)| \\ & \leq \sqrt{\frac{2DK \log(4RKN)}{N}} + \frac{1}{N} \log\left(\frac{1}{\rho}\right) \end{aligned}$$

with probability  $1 - \rho$ .

*Proof.* Since  $\min_{\mathbf{z} \in \{0,1\}^N} \frac{1}{2}(y - \mathbf{z}^\top W \mathbf{x})^2 \leq |y|^2 \leq 1$  for a given  $W$ , by Hoeffding inequality,

$$\begin{aligned} & P(|r_N(W) - r(W)| \geq \epsilon) \\ & \leq \exp(-2N\epsilon^2). \end{aligned}$$

Let  $\mathcal{N}(\delta)$  be a  $\delta$ -covering of the set  $\mathcal{W} := \{W \in \mathbb{R}^{K \times D} \mid \|W\|_F \leq R\}$  with  $|\mathcal{N}(\delta)| \leq \left(\frac{4R}{\delta}\right)^{DK}$ . Then for any  $W \in \mathcal{W}$ , we have  $\tilde{W} \in \mathcal{N}(\delta)$  with  $\|W - \tilde{W}\| \leq \delta$ . Applying a union bound, we have

$$\begin{aligned} & P\left(\sup_{\tilde{W} \in \mathcal{N}(\delta)} |r_N(\tilde{W}) - r(\tilde{W})| \geq \epsilon\right) \\ & \leq \left(\frac{4R}{\delta}\right)^{DK} \exp(-2N\epsilon^2). \end{aligned} \tag{24}$$

Then for  $\Delta W := W - \tilde{W}$  satisfying  $\|\Delta W\| \leq \delta$ , we can bound the difference of square loss of  $W$  and  $\tilde{W}$  by

$$\begin{aligned} & \min_{\mathbf{z} \in \{0,1\}^K} \frac{1}{2}(y - \mathbf{z}^\top W \mathbf{x})^2 - \min_{\mathbf{z} \in \{0,1\}^K} \frac{1}{2}(y - \mathbf{z}^\top \tilde{W} \mathbf{x})^2 \\ & \leq \frac{1}{2}(y - \tilde{\mathbf{z}}^\top W \mathbf{x})^2 - \frac{1}{2}(y - \tilde{\mathbf{z}}^\top \tilde{W} \mathbf{x})^2 \\ & \leq \|\Delta W\|_F \|\tilde{\mathbf{z}}\| + 2R\|\tilde{\mathbf{z}}\|^2 \|\Delta W\|_F \leq 3RK\epsilon \end{aligned} \tag{25}$$

where  $\tilde{\mathbf{z}} = \arg \min_{\mathbf{z} \in \{0,1\}^K} \frac{1}{2}(y - \mathbf{z}^\top W \mathbf{x})^2$  and we used the fact that  $\|\mathbf{x}\| \leq 1$  and  $|y| \leq 1$ . By symmetry, we have

$$\left| \min_{\mathbf{z} \in \{0,1\}^K} \frac{1}{2}(y - \mathbf{z}^\top \tilde{W} \mathbf{x})^2 - \min_{\mathbf{z} \in \{0,1\}^K} \frac{1}{2}(y - \mathbf{z}^\top W \mathbf{x})^2 \right| \leq 3RK\epsilon$$

. Combining (24) with (25), we have

$$\begin{aligned} & \sup_{W \in \mathcal{W}} |r_N(W) - r_N(W)| \\ & \leq 6RK\delta + \sqrt{\frac{DK}{2N} \log\left(\frac{4R}{\delta}\right) + \frac{1}{2N} \log\left(\frac{1}{\rho}\right)}. \end{aligned} \tag{26}$$

with probability  $1 - \rho$ . Setting  $\delta = 1/(6RK\sqrt{N})$  and apply Jennen's inequality gives the result.  $\square$

Then the following gives the proof for Theorem 2.

*Proof.* Let  $\bar{\mathbf{z}}_i = \arg \min_{\mathbf{z}_i \in \{0,1\}^K} (y_i - \mathbf{z}_i^\top \bar{W} \mathbf{x}_i)^2$  for  $i \in [N]$ . Denote  $\bar{Z}$  as the  $N \times K$  matrix stacked from  $(\bar{\mathbf{z}}_i^\top)_{i=1}^N$ . Let  $\{\bar{\mathbf{z}}^k\}_{k=1}^K$  be the columns of  $\bar{Z}$  and  $\bar{\mathcal{A}}$  be the indexes of atoms in the atomic set (5) that have the same 0-1 patterns to those columns. Denote  $\bar{\mathbf{c}}$  as the coefficient vector with  $\bar{c}_k = 1$  for  $k \in \bar{\mathcal{A}}$  and  $\bar{c}_k = 0$  for  $k \notin \bar{\mathcal{A}}$ . By the definition of  $F(\mathbf{c})$ , we have

$$F(\bar{\mathbf{c}}) \leq r_N(\bar{W}) + \frac{\tau}{2} \|\bar{W}\|_F^2 + \lambda \|\bar{\mathbf{c}}\|_1. \tag{27}$$

where  $r_N(\bar{W}) := \frac{1}{2N} \sum_{i=1}^N \min_{\mathbf{z} \in \{0,1\}^\kappa} (y_i - \mathbf{z}^\top \bar{W} \mathbf{x}_i)^2$  is the empirical risk of  $\bar{W}$ . Let  $\mathbf{c}^* := \arg \min_{\mathbf{c}: \text{supp}(\mathbf{c})=\bar{\mathcal{A}}} F(\mathbf{c})$ . We have  $F(\mathbf{c}^*) \leq F(\bar{\mathbf{c}})$ . Then from (18),

$$F(\hat{\mathbf{c}}) - F(\bar{\mathbf{c}}) \leq F(\hat{\mathbf{c}}) - F(\mathbf{c}^*) \leq \frac{4\gamma K}{\beta\mu^2} \left( \frac{1}{T} \right) + \frac{2(1-\mu)\lambda}{\mu} \sqrt{\frac{2K}{\beta}}. \quad (28)$$

In addition, the risk of  $\hat{W}$  satisfies

$$r_N(\hat{W}) + \frac{\tau}{2} \|\hat{W}\|_F^2 + \lambda \|\hat{\mathbf{c}}\|_1 \leq F(\hat{\mathbf{c}}) \quad (29)$$

by the definition of the empirical risk  $r_N(\cdot)$  (since it is minimized w.r.t. the hidden assignments). Combining (27), (28) and (29), we obtain a bound on the difference of empirical risk

$$\begin{aligned} r_N(\hat{W}) - r_N(\bar{W}) &\leq \underbrace{\frac{\tau}{2} \|\bar{W}\|^2 + \lambda K}_{\text{bias of regularization}} + \underbrace{\frac{4\gamma K}{\beta\mu^2} \left( \frac{1}{T} \right) + \frac{2(1-\mu)\lambda}{\mu} \sqrt{\frac{2K}{\beta}}}_{\text{optimization error}} \end{aligned} \quad (30)$$

The remaining task is to bound the estimation error  $|r(W) - r_N(W)|$ . Since Algorithm 1 is a descent algorithm w.r.t.  $F(\mathbf{c})$  and in the beginning  $F(0) \leq 1/2$ , we have  $\|\mathbf{c}\|_1 \leq 1/\lambda$  and  $\|W\|^2 \leq 1/\tau$  at any iterate. Then we can bound the estimation error by Lemma 3 for  $\hat{W}$  belonging to the set  $\mathcal{W}(T) := \{\hat{W} \in \mathbb{R}^{T \times D} \mid \|\hat{W}\|_F \leq \sqrt{1/\lambda\tau}\}$ , giving

$$|r(\hat{W}) - r_N(\hat{W})| \leq \sqrt{\frac{2DT \log(4TN/\sqrt{\lambda\tau})}{N}} + \frac{1}{N} \log\left(\frac{1}{\rho}\right). \quad (31)$$

Combining (30) and (31), and choosing  $\lambda = 1/(NK)$ ,  $\tau = 1/(NR^2)$ , we obtain  $r(\hat{W}) - r(\bar{W}) \leq \epsilon$  with  $T \geq \frac{4\gamma}{\mu^2\beta} \left( \frac{K}{\epsilon} \right)$ , and  $N \geq \frac{DT}{\epsilon^2} (2 \log(\frac{4RKT}{\epsilon}) + \log(\frac{1}{\rho}))$  for any  $0 < \epsilon < 1$ .  $\square$
